# Supplementary material for: Identification of the GDP-L-Galactose Phosphorylase Gene as a Candidate for the Regulation of Ascorbic Acid Content in Fruits of Capsicum annuum L
Source: MDPI journal article supplement (doi:10.3390/ijms24087529), 2023-04-19
Supplement: s1 [file s1]

Table S2: Summary of RNA-Seq library information.

| Sample    | Total reads (million) | Q20(%)     | Q30(%)     | GC content | Total mapped (million) |
|-----------|-----------------------|------------|------------|------------|------------------------|
| Z6_day 10 | 76.13±0.59            | 99.11±0.02 | 96.58±0.06 | 43.50±0.13 | 72.30±0.56             |
| Z6_day 50 | 74.70±1.46            | 99.09±0.04 | 96.52±0.15 | 43.47±0.05 | 70.90±1.53             |
| Z6_day 80 | 60.77±3.91            | 99.10±0.05 | 96.58±0.21 | 44.46±2.34 | 52.65±4.93             |
| Z5_day 10 | 73.09±3.37            | 99.10±0.03 | 96.55±0.06 | 43.34±0.12 | 62.49±3.38             |
| Z5_day 50 | 75.04±6.02            | 99.10±0.02 | 96.56±0.06 | 43.58±0.22 | 65.58±5.18             |
| Z5_day 80 | 70.00±1.60            | 99.10±0.11 | 96.55±0.34 | 43.47±0.35 | 60.47±2.01             |
