# Supplementary material for: Identification of the GDP-L-Galactose Phosphorylase Gene as a Candidate for the Regulation of Ascorbic Acid Content in Fruits of Capsicum annuum L
Source: MDPI journal article supplement (doi:10.3390/ijms24087529), 2023-04-19
Supplement: s1 [file s1]

Table S6: Primers used for VIGS construction and detection.

| Gene name                   | Gene symbol | Sequence                      |
|-----------------------------|-------------|-------------------------------|
| CA.PGAv.1.6.scaffold919.38  | CCS         | F: TTCCAAATCCAACCAAACAAAA     |
|                             |             | R: GGGTCAACGCAACATACCTTAA     |
| CA.PGAv1.1.6.scaffold65.175 | GGP         | F: ATGATGCTTAAGATTAAGAGGGTTCC |
|                             |             | R: TCTGCTGACGATCCTCCCAT       |
|                             | TRV2        | F: TGTTACTCAAGGAAGCACGAT      |
|                             |             | R: CCTAAAACTTCAGACACGGA       |
|                             | TRV1        | F: GAAAATATTGCTGCGCCTAACG     |
|                             |             | R: ACCTGCCACGGTTCGAAGTA       |
