# Supplementary material for: Identification of the GDP-L-Galactose Phosphorylase Gene as a Candidate for the Regulation of Ascorbic Acid Content in Fruits of Capsicum annuum L
Source: MDPI journal article supplement (doi:10.3390/ijms24087529), 2023-04-19
Supplement: s1 [file s1]

Table S7: Primers used for the qRT-PCR validation.

| Gene name                   | Amplicon size | Sequence                                                     |
|-----------------------------|---------------|--------------------------------------------------------------|
| CA.PGAv.1.6.scaffold421.5   | 236 bp        | F: AAATCTTCGGTTACTGATATTGGAC<br>R: ATACTCTTACCAGACAGAAACCTCG |
| CA.PGAv.1.6.scaffold2122.5  | 292 bp        | F: CATCCAAC TATTGATTTCCTGGC<br>R: TGTCCAACGGAACATCAGTTAGAT   |
| CA.PGAv.1.6.scaffold134.77  | 215 bp        | F: ACGAAGATGTTGTCGAGGTTTT<br>R: GCAGTTAATGATTCTGTGCTG        |
| CA.PGAv.1.6.scaffold1777.1  | 289 bp        | F: TTTCATTCTACCTCCCTCCAACC<br>R: TACCATCTCAGCCATGTCCTCGT     |
| CA.PGAv.1.6.scaffold6.15    | 212 bp        | F: CCGAAAGTGAGAAGTATGGATTG<br>R: GCTTGAGTGTGTTACAGGAGAACG    |
| CA.PGAv.1.6.scaffold291.8   | 214 bp        | F: GTGAGACAGAGACCGTGGGGAA<br>R: GAGGTGAAGTATCTTGAGAAAGCAA    |
| CA.PGAv.1.6.scaffold490.14  | 124 bp        | F: GAGAGCAGAACCCCAACATCA<br>R: AAAACACCAGGAACGAAACCA         |
| CA.PGAv.1.6.scaffold767.43  | 274 bp        | F: AAAC TTTGTACTATGGAAGGAGC<br>R: GAGGTGTTGTAACACTAGACATG    |
| CA.PGAv.1.6.scaffold1034.48 | 232 bp        | F: TCTCTTCTTCGCTTCAAATGTGTCT<br>R: CATAGTGGGTAAAGGGGGATC     |
| CA.PGAv.1.6.scaffold1234.3  | 152 bp        | F: GAAGGAAGGCCATGGGGTCAT<br>R: GCAACAAAGCTGTGGAATAGAAC       |
| UBI-3                       | 216 bp        | F: CACATGTACAAGACTGACAGGGCCA<br>R: AGACCCGTTCTTGACAACCCAC    |
